# Supplementary material for: Free-standing graphene oxide/oxidized carbon nanotube films with mixed proton and electron conductor properties
Source: Royal Society of Chemistry journal article supplement (doi:10.1039/d2ya00314g), 2023-01-01
Supplement: d2ya00314g1.pdf [file d2ya00314g1.pdf]

## Free-standing graphene oxide/oxidized carbon nanotube films with mixed proton and electron conductor properties

Nurun Nahar Rabin,<sup>a,b</sup> Md. Saidul Islam,<sup>a,b</sup> Mohammad Atiqur Rahman,<sup>b</sup>  
Tagawa Ryuta,<sup>b</sup> Yuta Shudo,<sup>c</sup> Yoshihiro Sekine,<sup>b,d</sup> and Shinya Hayami<sup>i\*a, b, e</sup>

<sup>a</sup>Institute of Industrial Nanomaterials (IINa), Kumamoto University, 2-39-1 Kurokami, Chuo-ku, Kumamoto 860-8555, (Japan).

<sup>b</sup>Department of Chemistry, Graduate School of Science and Technology, Kumamoto University, 2-39-1 Kurokami, Chuo-ku, Kumamoto 860-8555, (Japan).

<sup>c</sup>National Institute of Advanced Industrial Science and Technology (AIST), Japan, Japan.

<sup>d</sup>Priority Organization for Innovation and Excellence, Kumamoto University, 2-39-1 Kurokami, Chuo-ku, Kumamoto 860-8555 (Japan).

<sup>e</sup>International Research Center for Agricultural and Environmental Biology (IRCAEB)2-39-1 Kurokami, Chuo-ku, Kumamoto 860-8555, (Japan).

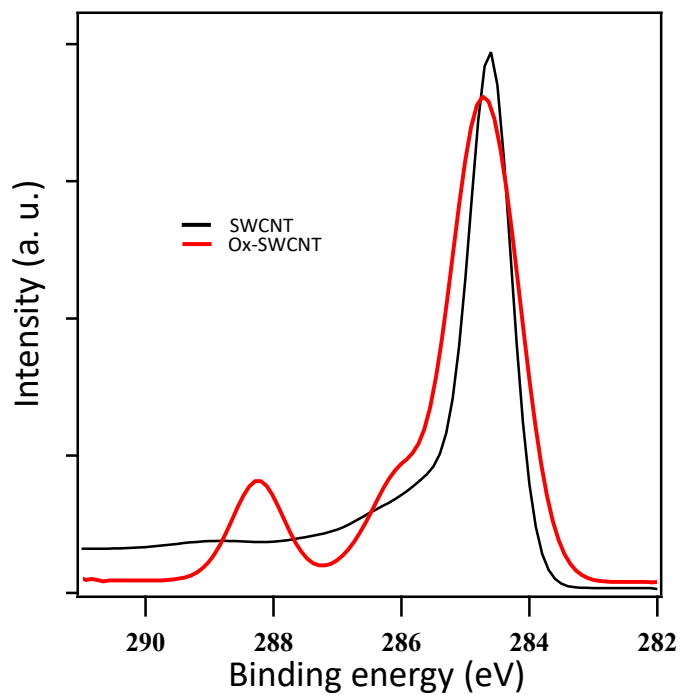

Figure S1: C1s XPS spectra of SWCNT and Ox-SWCNT

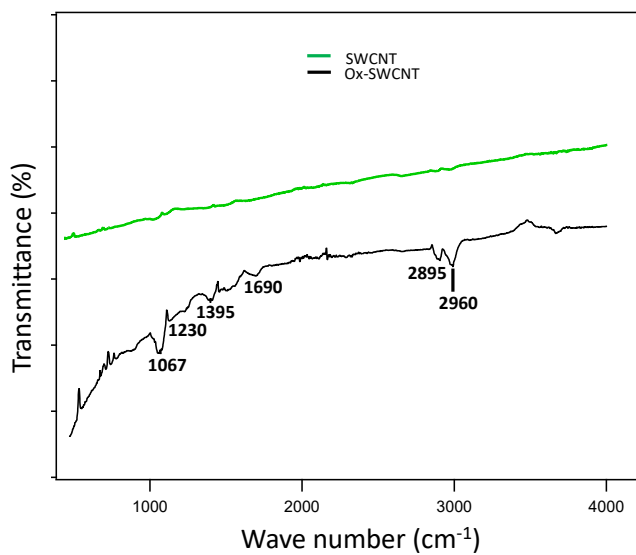

Figure S2: FT-IR spectra of SWCNT and Ox-SWCNT

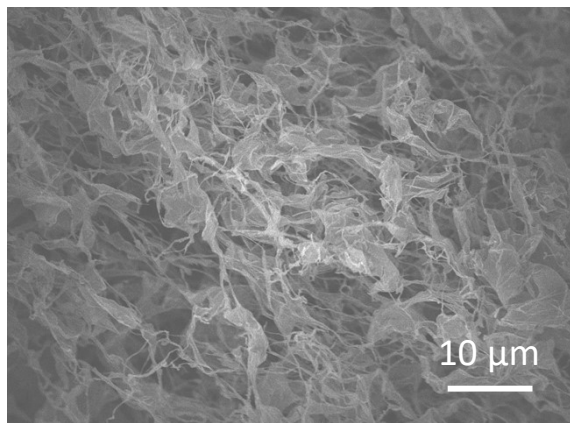

Figure S3: SEM image of GO/Ox-SWCNT representing the distribution of GO and Ox-SWCNT and demonstrates the attachment of Ox-SWCNT to GO

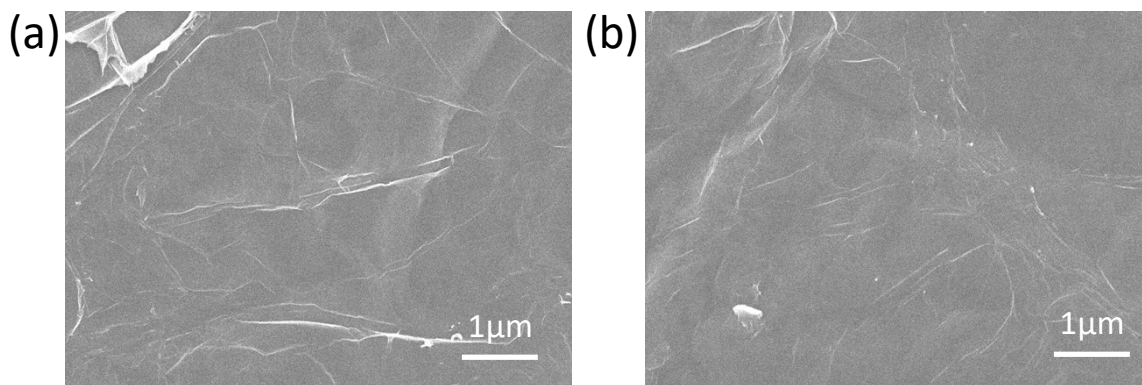

Figure S4: SEM image of GO/Ox-SWCNT (a) before and (b) after the bending of film

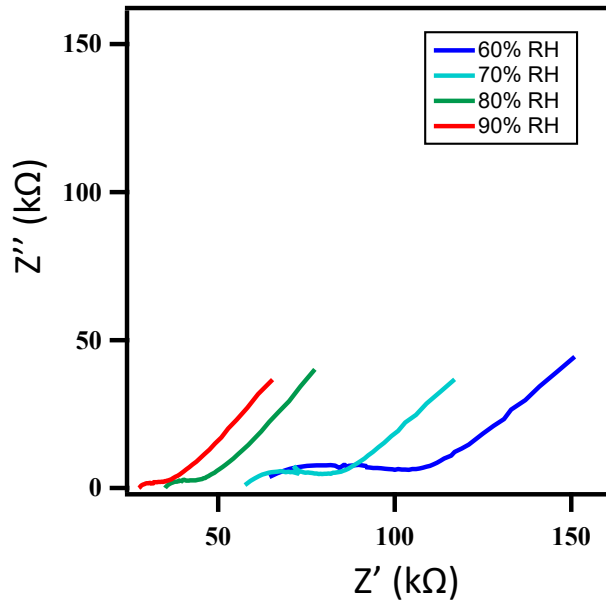

Figure S5: Representative cole-cole plot of of GO/Ox-SWCNT depending on RH at room temperature.

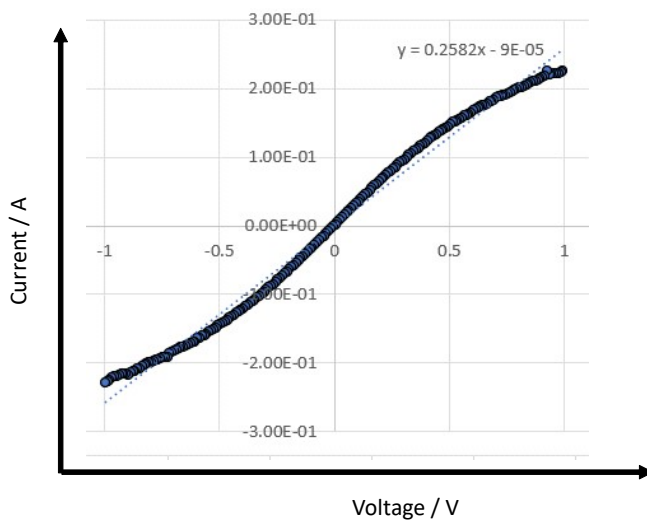

Figure S6: I-V plot of pristine SWCNT measured in the in-plane direction at room temperature and 50% RH for measurement of electrical conductivity in the out of plane direction.
